# Supplementary material for: Large enhanced photocatalytic activity of g-C3N4 by fabrication of a nanocomposite with introducing upconversion nanocrystal and Ag nanoparticles
Source: Royal Society of Chemistry journal article supplement (doi:10.1039/c8ra07901c), 2018-01-01
Supplement: c8ra07901c1.pdf [file c8ra07901c1.pdf]

## Supporting Information

### **Large enhanced photocatalytic activity of g-C<sub>3</sub>N<sub>4</sub> by fabrication of a nanocomposite with introducing upconversion nanocrystal and Ag nanoparticles**

Feifei Zhao, Kyu Kyu Khaing, Dongguang Yin\*, Bingji Liu, Tao Chen, Chenglong Wu, Kexian Huang, LinLin Deng, Luqiu Li

*School of Environmental and Chemical Engineering, Shanghai University, Shanghai,*

*200444, E-mail: [ydg@shu.edu.cn](mailto:ydg@shu.edu.cn)*

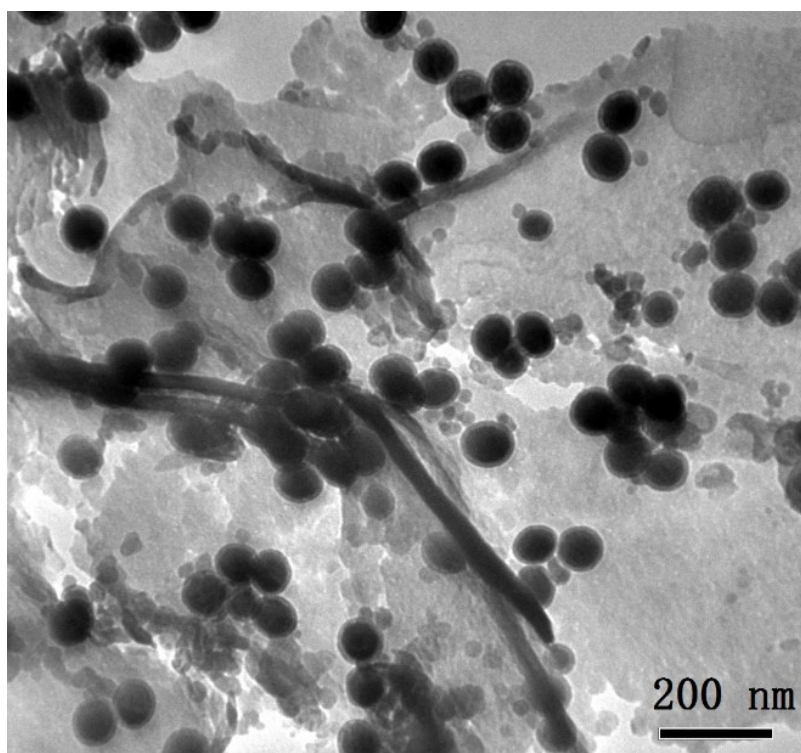

**Fig. S1.** TEM image of UCNPs@SiO<sub>2</sub>/g-C<sub>3</sub>N<sub>4</sub>.

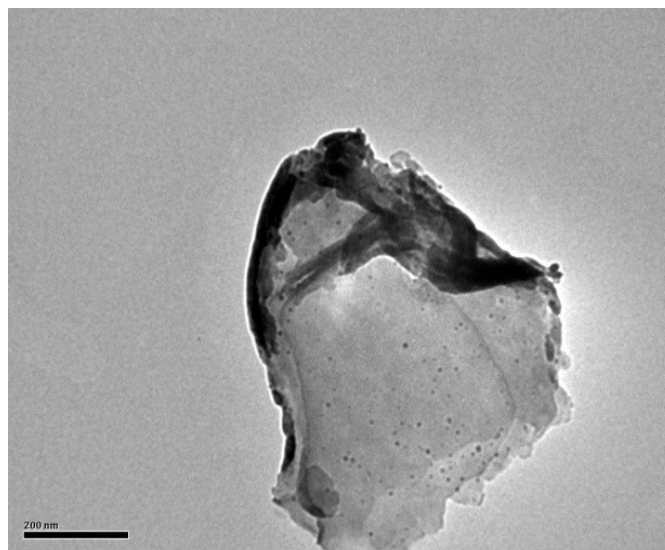

**Fig. S2.** TEM image of 3wt%Ag/g-C<sub>3</sub>N<sub>4</sub>.

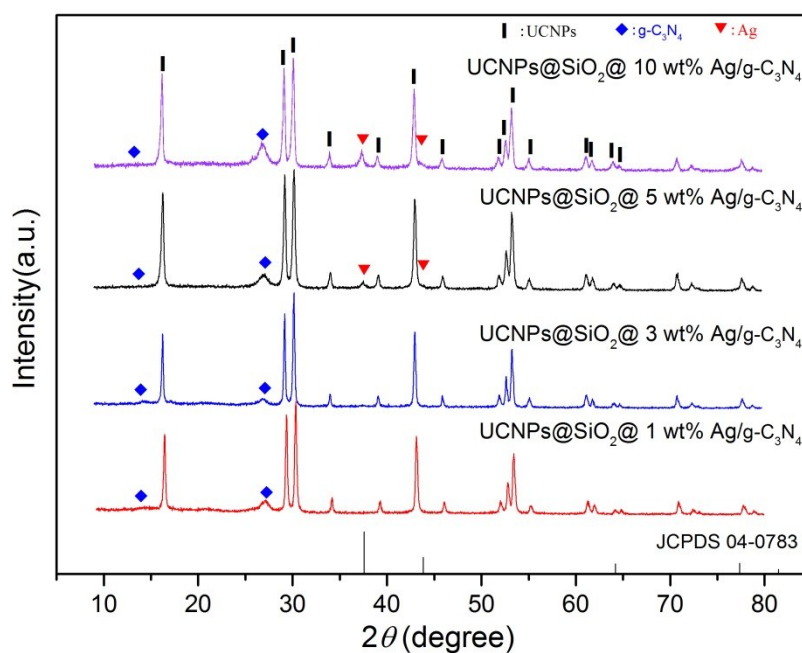

**Fig. S3.** XRD patterns of the UCNPs@SiO<sub>2</sub>@*X*wt% Ag/g-C<sub>3</sub>N<sub>4</sub> nanocomposites with different doping amounts of Ag (*X*=1, 3, 5, and 10). The corresponding standard data for the face-centered cubic phase of silver (JCDs 04-0783) is also given at the bottom.

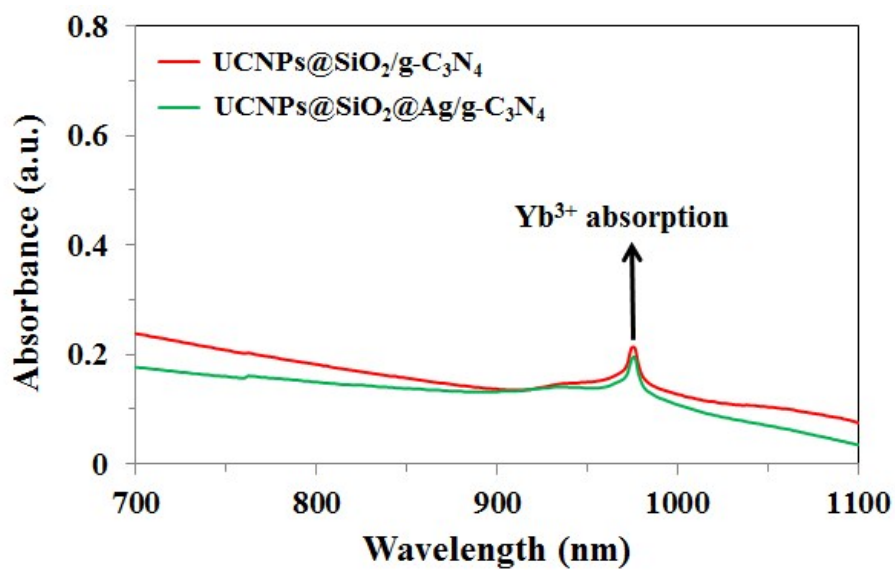

**Fig. S4.** Absorption spectra of UCNPs@SiO<sub>2</sub>/g-C<sub>3</sub>N<sub>4</sub> and UCNPs@SiO<sub>2</sub>@Ag/g-C<sub>3</sub>N<sub>4</sub> nanocomposites in ethanol.

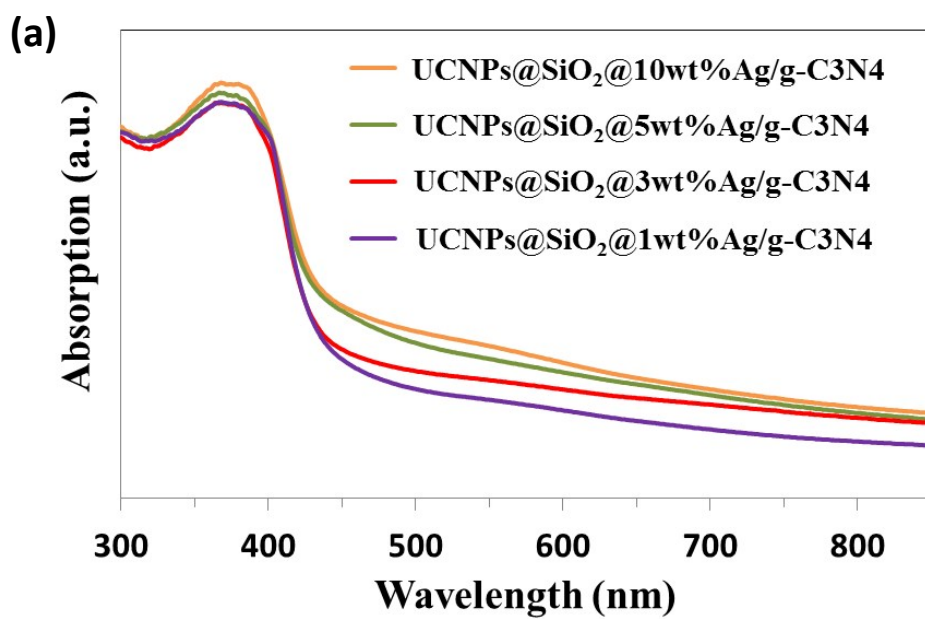

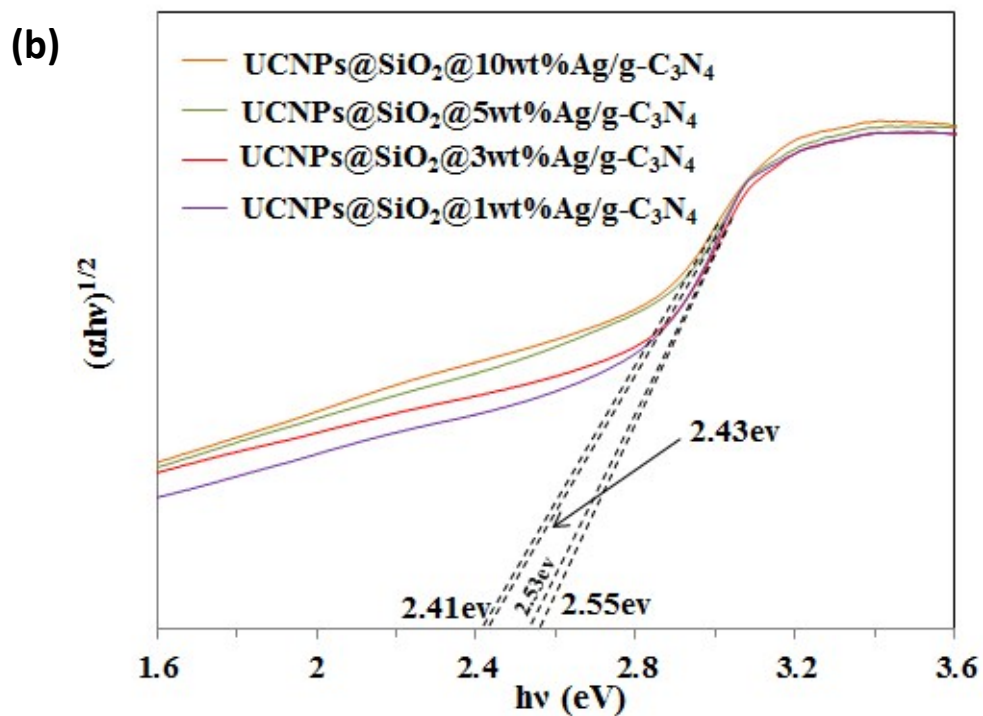

**Fig. S5.** (a) UV-Vis-NIR diffuse reflectance spectra of UCNPs@SiO<sub>2</sub>@Xwt% Ag/g-C<sub>3</sub>N<sub>4</sub> nanocomposites with different doping amounts of Ag (X = 1, 3, 5, and 10). (b) Plots of  $(\alpha hv)^{1/2}$  vs. photon energy ( $h\nu$ ).

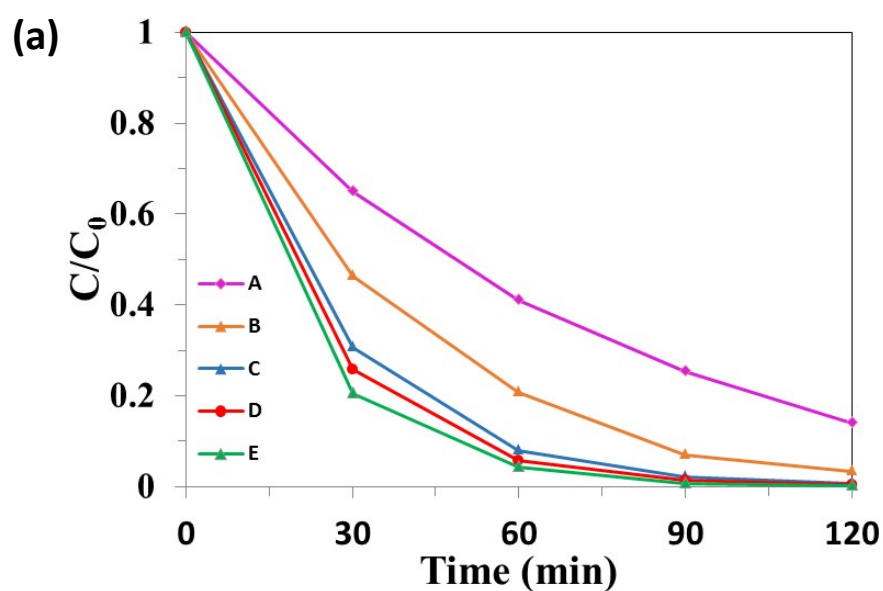

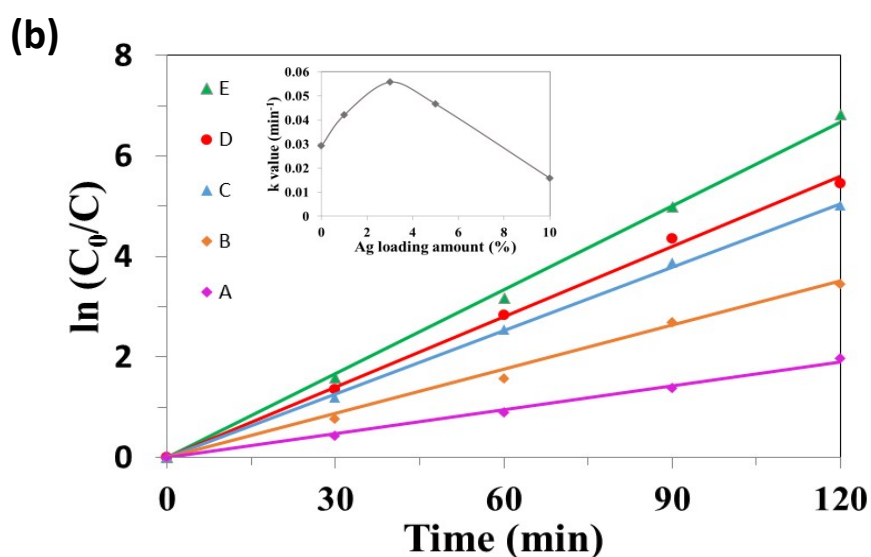

**Fig. S6.** (a) Photocatalytic degradation of RhB and (b) the kinetics study over different photocatalysts under simulated solar light irradiation: (A) UCNPs@SiO<sub>2</sub>@10wt%Ag/g-C<sub>3</sub>N<sub>4</sub>; (B) UCNPs@SiO<sub>2</sub>/g-C<sub>3</sub>N<sub>4</sub>; (C) UCNPs@SiO<sub>2</sub>@1wt%Ag/g-C<sub>3</sub>N<sub>4</sub>; (D) UCNPs@SiO<sub>2</sub>@5wt%Ag/g-C<sub>3</sub>N<sub>4</sub>; (E) UCNPs@SiO<sub>2</sub>@3wt%Ag/g-C<sub>3</sub>N<sub>4</sub>. The inset in (b) shows the rate constants vs Ag loading.

The possible mechanism of photocatalytic degradation of RhB in the presence of UCNPs@SiO<sub>2</sub>@Ag/g-C<sub>3</sub>N<sub>4</sub> photocatalyst under simulated solar light irradiation is depicted in Fig. S7. After absorbing the solar and upconverted light, the excited g-C<sub>3</sub>N<sub>4</sub> generates electron-hole pairs. The electrons transfer from the VB of g-C<sub>3</sub>N<sub>4</sub> to the surface of Ag NPs. These electrons accumulated on the surface of Ag NPs react with O<sub>2</sub> to produce •O<sub>2</sub><sup>-</sup> radicals, while the holes in the VB of g-C<sub>3</sub>N<sub>4</sub> can react with OH<sup>-</sup>/H<sub>2</sub>O to generate •OH radicals. These reactive radicals and holes can directly take part in the photocatalytic degradation reaction to degrade RhB.

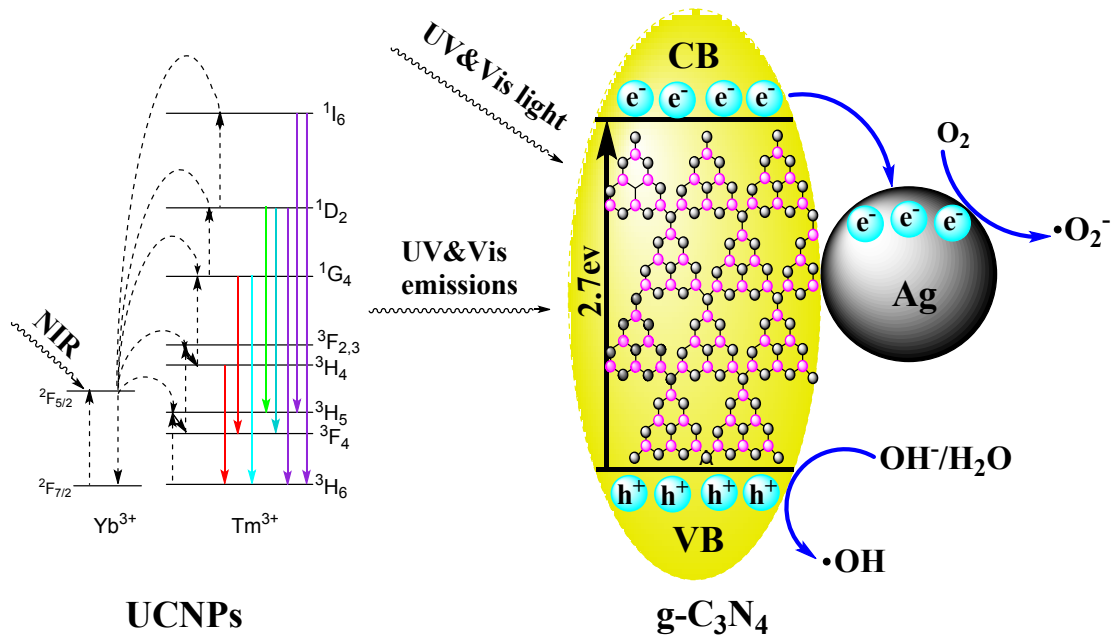

**Fig. S7.** Schematic illustration of photocatalytic mechanism of degradation of RhB over UCNPs@SiO<sub>2</sub>@Ag/g-C<sub>3</sub>N<sub>4</sub> photocatalysts under simulated solar light irradiation.

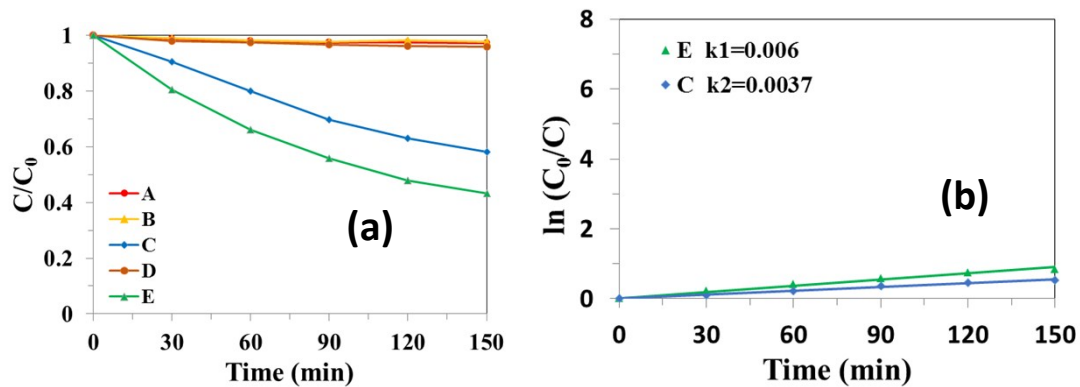

**Fig. S8.** (a) Photocatalytic degradation of RhB and (b) the kinetics study over different photocatalysts under NIR light irradiation: (A) UCNPs@SiO<sub>2</sub>@Ag; (B) bulk g-C<sub>3</sub>N<sub>4</sub>; (C) UCNPs@SiO<sub>2</sub>/g-C<sub>3</sub>N<sub>4</sub>; (D) Ag/g-C<sub>3</sub>N<sub>4</sub>; (E) UCNPs@SiO<sub>2</sub>@3wt%Ag/g-C<sub>3</sub>N<sub>4</sub>.

The XPS spectra of the as-synthesized UCNPs@SiO<sub>2</sub>@3wt%Ag/g-C<sub>3</sub>N<sub>4</sub> nanocomposite were analyzed to further confirm the chemical composition and the

status of the elements. The XPS spectra of UCNPs@SiO<sub>2</sub>@3wt%Ag/g-C<sub>3</sub>N<sub>4</sub> are shown in Fig. S9. The C 1s spectrum has four distinct peaks centered at 284.12, 285.30, 287.51 and 292.22 eV, which are assigned to the adventitious carbon (C–C), the sp<sup>3</sup>-hybridized carbon (C–(N)<sub>3</sub>), the sp<sup>2</sup>-hybridized carbon (N–C=N) and π–π\*. The N 1s spectrum is separated into four peaks centered at 398.12, 398.96, 400.66 and 404.00 eV, which are assigned to the sp<sup>2</sup>-hybridized nitrogen in aromatic triazine rings (C–C=N), the tertiary nitrogen (N-(C)<sub>3</sub>), the free amino groups (C–N–H), and the charging effects or positive charge localization in the heterocycles, respectively. The Ag 3d spectrum presents two individual peaks at about 367.60 and 373.60 eV with 6.0 eV splitting between the two peaks, which corresponds to the metallic Ag<sup>0</sup> species. The binding energies at 102.50 eV and 531.97 eV are attributed to the Si<sup>4+</sup> and O<sup>2-</sup>, respectively, suggesting the existence of SiO<sub>2</sub>. XPS peaks of Na (1s, 1072.47 eV), Gd (4d, 140.46 eV), F (1s, 685.85 eV), Lu (4d<sub>5/2</sub>, 197.11 eV), Lu (4d<sub>3/2</sub>, 206.53 eV), Yb (4d, 182.37 eV), and Tm (4d, 175.39 eV) are also found in Fig. S9 f~k.



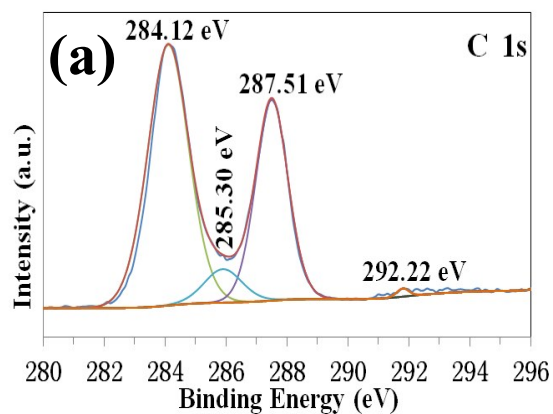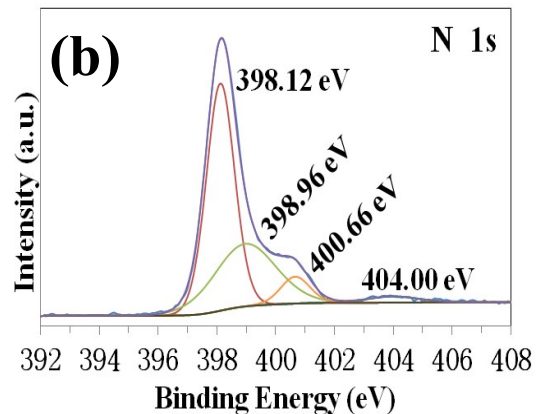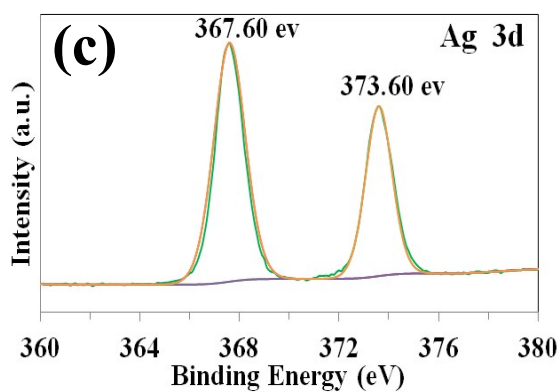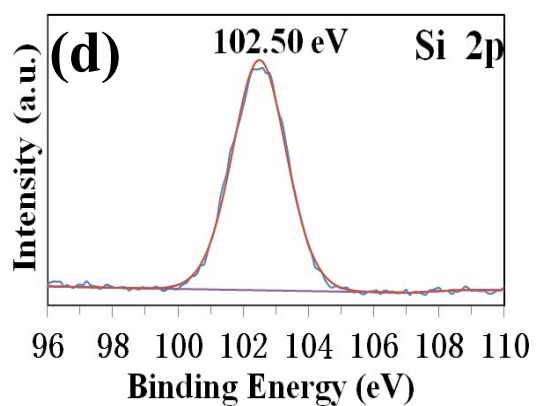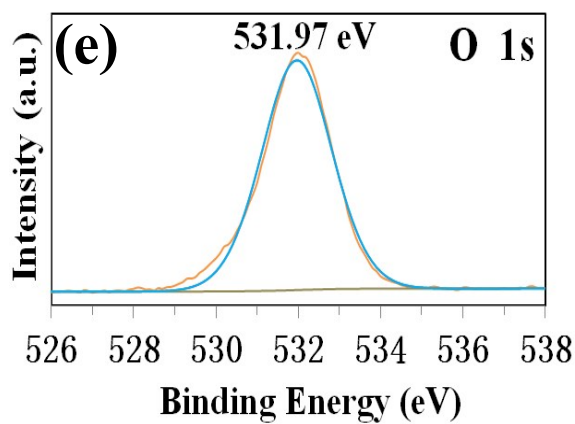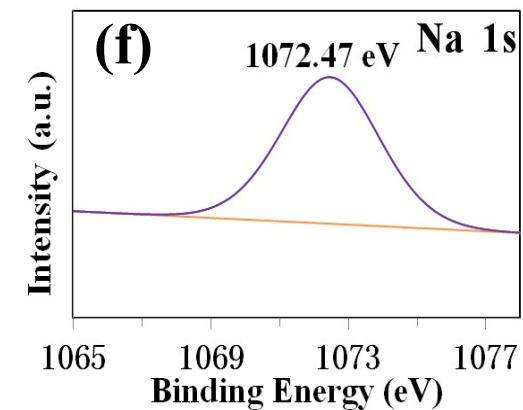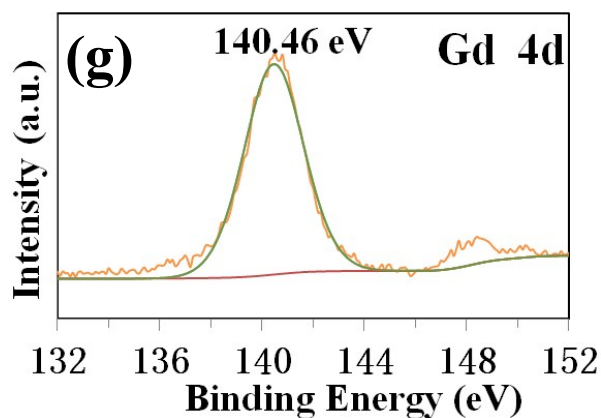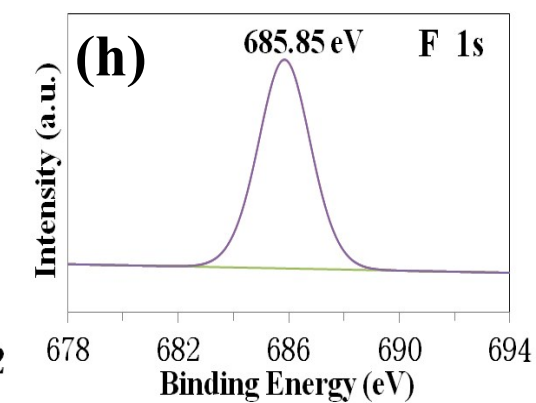



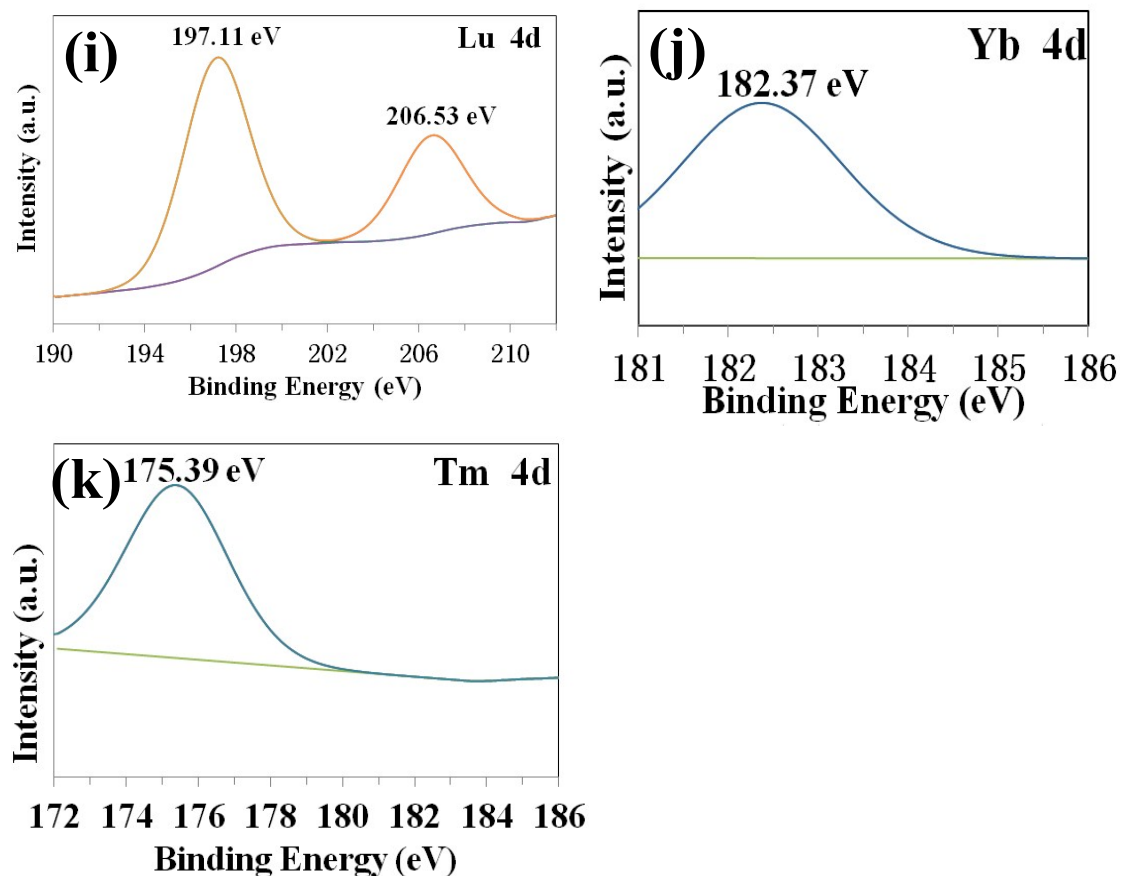

**Fig. S9.** XPS spectra of UCNPs@SiO<sub>2</sub>@3wt%Ag/g-C<sub>3</sub>N<sub>4</sub> nanocomposite: (a) C 1s, (b) N 1s, (c) Ag 3d, (d) Si 2p, (e) O 1s, (f) Na 1s, (g) Gd 4d, (h) F 1s, (i) Lu 4d, (j) Yb 4d, (k) Tm 4d.

**Table. S1.** Comparison with different photocatalysts for photocatalytic degradation of organic pollutant under simulated solar light irradiation.

| photocatalyst                                                  | organic pollutant | time (min) | efficiency | reference |
|----------------------------------------------------------------|-------------------|------------|------------|-----------|
| g-C <sub>3</sub> N <sub>4</sub>                                | RhB               | 150        | 62%        | this work |
| UCNPs@SiO <sub>2</sub> /g-C <sub>3</sub> N <sub>4</sub>        | RhB               | 150        | 100%       | this work |
| Ag/g-C <sub>3</sub> N <sub>4</sub>                             | RhB               | 120        | 100%       | this work |
| UCNPs@SiO <sub>2</sub> @1wt%Ag/g-C <sub>3</sub> N <sub>4</sub> | RhB               | 90         | 98%        | this work |
| UCNPs@SiO <sub>2</sub> @3wt%Ag/g-C <sub>3</sub> N <sub>4</sub> | RhB               | 90         | 100%       | this work |
| UCNPs@SiO <sub>2</sub> @5wt%Ag/g-C <sub>3</sub> N <sub>4</sub> | RhB               | 90         | 99%        | this work |

|                                                                                                             |               |     |        |           |
|-------------------------------------------------------------------------------------------------------------|---------------|-----|--------|-----------|
| UCNPs@SiO <sub>2</sub> @10wt%Ag/g-C <sub>3</sub> N <sub>4</sub>                                             | RhB           | 90  | 75     | this work |
| NaYF <sub>4</sub> :Yb <sup>3+</sup> ,Er <sup>3+</sup> ,Tm <sup>3+</sup> /g-C <sub>3</sub> N <sub>4</sub>    | methyl orange | 420 | 47%    | 23        |
| Au-NaYF <sub>4</sub> :Yb <sup>3+</sup> ,Er <sup>3+</sup> ,Tm <sup>3+</sup> /g-C <sub>3</sub> N <sub>4</sub> | methyl orange | 420 | 83%    | 23        |
| UCNPs@SiO <sub>2</sub> /TiO <sub>2</sub>                                                                    | RhB           | 210 | 83.98% | 25        |
| UCNPs@SiO <sub>2</sub> @Ag/TiO <sub>2</sub>                                                                 | RhB           | 210 | 99.46% | 25        |
| UCNPs@SiO <sub>2</sub> @CeO <sub>2</sub>                                                                    | RhB           | 210 | 63%    | 26        |
| UCNPs@SiO <sub>2</sub> @CeO <sub>2</sub> :Tm                                                                | RhB           | 210 | 82%    | 26        |
| UCNPs@SiO <sub>2</sub> @CeO <sub>2</sub> :Tm/GN                                                             | RhB           | 210 | 95%    | 26        |

**Table. S2.** Comparison with different photocatalysts for photocatalytic hydrogen evolution.

| photocatalyst                                                         | sacrificial agent                                  | H <sub>2</sub> generation rate<br>( $\mu\text{mol}\cdot\text{h}^{-1}\cdot\text{g}^{-1}$ ) | light<br>(nm) | reference |
|-----------------------------------------------------------------------|----------------------------------------------------|-------------------------------------------------------------------------------------------|---------------|-----------|
| g-C <sub>3</sub> N <sub>4</sub>                                       | triethanolamine                                    | 72                                                                                        | 190-<br>1100  | this work |
| UCNPs@SiO <sub>2</sub> /g-C <sub>3</sub> N <sub>4</sub>               | triethanolamine                                    | 319                                                                                       | 190-<br>1100  | this work |
| Ag/g-C <sub>3</sub> N <sub>4</sub>                                    | triethanolamine                                    | 507                                                                                       | 190-<br>1100  | this work |
| UCNPs@SiO <sub>2</sub> @Ag/g-C <sub>3</sub> N <sub>4</sub>            | triethanolamine                                    | 873                                                                                       | 190-<br>1100  | this work |
| Pr <sup>3+</sup> -Y <sub>2</sub> SiO <sub>5</sub> /CaTiO <sub>3</sub> | perfluorodecalin                                   | 1.05                                                                                      | 420-<br>1100  | 57        |
| SrTiO <sub>3</sub> -Er <sup>3+</sup>                                  | Na <sub>2</sub> SO <sub>3</sub> /Na <sub>2</sub> S | 46.23                                                                                     | 420-<br>1100  | 58        |
